# Supplementary material
Source: HighWire-hosted journal article supplement (doi:10.1101/rna.051573.115)
Supplement: Table_S1.xlsx [file Table_S1.xlsx]

## Sheet: Sheet1
Affy Gene Symbol	Gene_Symbol	Unigene	Raw Est Fold Change	Individual Transcript p-value	Gene Descriptor
RFX4	RFX4	Hs.388827	11.647	0.0002	regulatory factor X, 4 (influences HLA class II expression)
---	PRO1621	---	11.37	0.0011	PRO1621 protein
---	KCNIP4	---	10.652	0.0004	Kv channel interacting protein 4
STARD10	STARD10	---	10.361	0.0038	START domain containing 10
---	LOC728245 /// LOC731771	---	8.947	0.0214	hypothetical protein LOC728245 /// hypothetical protein LOC731771
LOC100129387	GABPB2	Hs.511316	8.289	0.0011	GA binding protein transcription factor, beta subunit 2
TRIML2	FLJ25801	---	8.034	0.0135	hypothetical protein FLJ25801
TRIM78P	TRIMP1	---	7.891	0.0023	tripartite motif-containing pseudogene 1
PROCA1	PROCA1	---	7.85	0.0022	proline-rich cyclin A1-interacting protein
ZPLD1	ZPLD1	---	7.59	0.0173	zona pellucida-like domain containing 1
MIR17HG	C13orf25	---	7.588	0.0101	chromosome 13 open reading frame 25
RAB26	RAB26	Hs.3797	7.31	0	RAB26, member RAS oncogene family
ABI3BP	ABI3BP	---	7.291	0.01	ABI gene family, member 3 (NESH) binding protein
---	EPHA5	Hs.175396	6.078	0.0082	EPH receptor A5
CD44	CD44	---	6.054	0.0251	CD44 molecule (Indian blood group)
RS1	RS1	---	5.999	0.0364	retinoschisis (X-linked, juvenile) 1
ANKRD9	ANKRD9	---	5.98	0.0012	Ankyrin repeat domain 9
TMEM144	TMEM144	Hs.591673	5.904	0.0057	transmembrane protein 144
---	PTK2	---	5.867	0.0003	PTK2 protein tyrosine kinase 2
TOB2	TOB2	---	5.835	0.0089	transducer of ERBB2, 2
---	ELF4	---	5.753	0.0105	E74-like factor 4 (ets domain transcription factor)
PIP4K2B	PIP4K2B	Hs.260603	5.657	0.0001	Phosphatidylinositol-4-phosphate 5-kinase, type II, beta
LOC283682	LOC283682	---	5.591	0.0381	hypothetical protein LOC283682
OPN5	OPN5	---	5.546	0.0308	opsin 5
LRMP	LRMP	---	5.402	0.0417	Lymphoid-restricted membrane protein
SLC17A9	C20orf59	---	5.28	0.0046	chromosome 20 open reading frame 59
SLC7A1	SLC7A1	---	5.194	0.0269	solute carrier family 7 (cationic amino acid transporter, y+ system), member 1
---	A2BP1	---	5.094	0.0006	Ataxin 2-binding protein 1
OR4D1	OR4D1	---	5.004	0.0026	olfactory receptor, family 4, subfamily D, member 1
SNCG	SNCG	---	4.988	0.0008	synuclein, gamma (breast cancer-specific protein 1)
FAM13C	FAM13C1	---	4.932	0.0275	family with sequence similarity 13, member C1
CHD6	CHD6	---	4.93	0.0199	chromodomain helicase DNA binding protein 6
LOC100288294	---	---	4.8	0.0248	Transcribed locus
MTTP	MTTP	---	4.794	0.0267	microsomal triglyceride transfer protein
JAKMIP3	C10orf39	Hs.106254	4.794	0.0008	chromosome 10 open reading frame 39
LTBP4	LTBP4	---	4.79	0.0201	Latent transforming growth factor beta binding protein 4
SLC2A12	SLC2A12	---	4.732	0.0264	solute carrier family 2 (facilitated glucose transporter), member 12
---	LRP4	---	4.627	0.0012	Low density lipoprotein receptor-related protein 4
SYT12	SYT12	---	4.61	0.002	Synaptotagmin XII
MYO7A	MYO7A	---	4.607	0.0439	myosin VIIA
UGT1A	UGT1A6	---	4.534	0.0455	UDP glucuronosyltransferase 1 family, polypeptide A9
C20orf96	C20orf96	---	4.496	0.0469	chromosome 20 open reading frame 96
HCG22	HCG22	---	4.488	0.0009	HLA complex group 22
ARHGEF12	ARHGEF12	---	4.476	0.0451	Rho guanine nucleotide exchange factor (GEF) 12
EBF3	EBF3	---	4.436	0.0284	early B-cell factor 3
IL1RAP	IL1RAP	---	4.344	0.0288	interleukin 1 receptor accessory protein
RAB26	RAB26	---	4.254	0.0002	RAB26, member RAS oncogene family
KCNJ3	KCNJ3	---	4.247	0.0066	potassium inwardly-rectifying channel, subfamily J, member 3
---	---	Hs.370762	4.155	0.0004	Similar to Laminin receptor 1
RANBP3L	RANBP3L	---	4.138	0.0153	RAN binding protein 3-like
CLEC11A	CLEC11A	Hs.512680	4.131	0.0019	C-type lectin domain family 11, member A
ZNF831	C20orf174	---	4.113	0.0136	chromosome 20 open reading frame 174
---	EHMT2	---	3.99	0.0117	Euchromatic histone-lysine N-methyltransferase 2
GRM1	GRM1	---	3.872	0.0396	glutamate receptor, metabotropic 1
TCF3	TCF3	---	3.863	0.0012	Transcription factor 3 (E2A immunoglobulin enhancer binding factors E12/E47)
---	CCND2	---	3.852	0.0202	Cyclin D2
VPS13B	VPS13B	---	3.851	0.0188	vacuolar protein sorting 13 homolog B (yeast)
---	GATA6	---	3.786	0.0356	GATA binding protein 6
ABCA1	ABCA1	---	3.692	0.0382	ATP-binding cassette, sub-family A (ABC1), member 1
---	HMGB2	Hs.434953	3.677	0.0003	High-mobility group box 2
LOC100272217	LOC158301	---	3.534	0.0021	Hypothetical protein LOC158301
C9orf45	C9orf45	---	3.529	0.028	chromosome 9 open reading frame 45 /// chromosome 9 open reading frame 45
---	CHRNA10	---	3.515	0.0444	Cholinergic receptor, nicotinic, alpha polypeptide 10
HIST2H2BE	HIST2H2BE	Hs.2178	3.417	0	histone cluster 2, H2be
---	RHBDD1	---	3.384	0.0141	Rhomboid domain containing 1
PTGIR	PTGIR	---	3.363	0	prostaglandin I2 (prostacyclin) receptor (IP)
LOC400960	LOC400960	Hs.516253	3.33	0.0003	hypothetical gene supported by BC040598
FAM45A	FAM45A	---	3.321	0.0447	family with sequence similarity 45, member A
FLJ39739	FLJ39739	---	3.311	0.021	FLJ39739 protein
LOC100272217	LOC158301	---	3.301	0.002	Hypothetical protein LOC158301
SIGLEC9	SIGLEC9	---	3.272	0.0437	sialic acid binding Ig-like lectin 9
BC011766	LOC728210	---	3.271	0.0006	Hypothetical protein LOC728210
CD79B	CD79B	---	3.256	0.0035	CD79b molecule, immunoglobulin-associated beta
RNF165	RNF165	Hs.501114	3.249	0	ring finger protein 165
LOC100288271	LOC730496	---	3.209	0.0188	hypothetical protein LOC730496
---	TJP2	---	3.18	0.029	Tight junction protein 2 (zona occludens 2)
GAL3ST2	GAL3ST2	---	3.16	0.0206	galactose-3-O-sulfotransferase 2
LOC253044	LOC253044	---	3.093	0.0056	hypothetical protein LOC253044
VWA5A	LOH11CR2A	---	3.069	0.0374	loss of heterozygosity, 11, chromosomal region 2, gene A
PNCK	PNCK	---	3.034	0.0215	pregnancy upregulated non-ubiquitously expressed CaM kinase
CRH	CRH	---	3.028	0.0214	corticotropin releasing hormone
A2M	A2M	---	3.01	0.0259	alpha-2-macroglobulin
LOC401588	LOC401588	---	2.982	0	hypothetical LOC401588
HIST1H1A	HIST1H1A	---	2.965	0.0257	histone cluster 1, H1a
PRDM16	PRDM16	---	2.959	0.0415	PR domain containing 16
ERF	ERF	---	2.955	0.0121	Ets2 repressor factor
FAM187B	FLJ25660	---	2.911	0.0283	hypothetical protein FLJ25660
ADAMTSL1	ADAMTSL1	---	2.883	0.0031	ADAMTS-like 1
C11orf71	C11orf71	Hs.91816	2.872	0	chromosome 11 open reading frame 71
CLEC11A	CLEC11A	---	2.871	0.0003	C-type lectin domain family 11, member A /// C-type lectin domain family 11, member A
TFDP1	TFDP1	Hs.79353	2.87	0	transcription factor Dp-1
TMPRSS2	TMPRSS2	---	2.847	0.0425	transmembrane protease, serine 2
---	X Kell blood group precursor-r	Hs.282082	2.838	0.0001	X Kell blood group precursor-related family, member 7
LEKR1	FLJ16641	Hs.478048	2.773	0.0001	FLJ16641 protein
HIST1H2BB	HIST1H2BB	---	2.763	0.0419	histone cluster 1, H2bb
C20orf112	C20orf112	Hs.516977	2.748	0	chromosome 20 open reading frame 112
ZNF518B	KIAA1729	Hs.455089	2.736	0.0001	KIAA1729 protein
CDH16	CDH16	---	2.683	0.0091	cadherin 16, KSP-cadherin
HIST1H3B	HIST1H3B	---	2.656	0.0032	histone cluster 1, H3b
LOC644450	LOC644450	---	2.643	0.0108	hypothetical protein LOC644450
LOC729013	LOC729013	Hs.34068	2.627	0.0004	hypothetical protein LOC729013
---	MGC16733	---	2.622	0.0184	Hypothetical protein FLJ25037
CDKN2AIPNL	MGC13017	Hs.156506	2.62	0	similar to RIKEN cDNA A430101B06 gene
---	GENX-3414	---	2.613	0.0027	Genethonin 1
FAM3D	FAM3D	---	2.612	0.0496	family with sequence similarity 3, member D
---	LOC729776	Hs.645315	2.61	0	hypothetical protein LOC729776
LOC439911	LOC439911	---	2.609	0.0001	hypothetical gene supported by NM_194304
---	NSMCE2	---	2.608	0.043	Non-SMC element 2 homolog (MMS21, S. cerevisiae)
LOC645722	LOC645722	---	2.582	0.0014	hypothetical LOC645722
MIB2	MIB2	Hs.135805	2.564	0.0003	mindbomb homolog 2 (Drosophila)
---	C12orf32	Hs.198853	2.555	0.0003	Chromosome 12 open reading frame 32
HIST2H2AA3 /// HIST2H2AA4	HIST2H2AA3 /// HIST2H2AA4	---	2.532	0.0008	histone cluster 2, H2aa3 /// histone cluster 2, H2aa4
ST7OT1	ST7OT1	---	2.518	0.0021	ST7 overlapping transcript 1 (antisense non-coding RNA)
---	PBX1	---	2.515	0.0012	Pre-B-cell leukemia transcription factor 1
LOC646903	LOC646903	Hs.632559	2.513	0	hypothetical LOC646903
LPIN3	LPIN3	---	2.51	0.0283	lipin 3
HIST3H2A	HIST3H2A	---	2.507	0.0006	histone cluster 3, H2a
LOC730631	HIST2H4	Hs.55468	2.506	0	Histone 2, H4
C22orf45	ADORA2A	---	2.496	0.0068	Adenosine A2a receptor
TRIM54	TRIM54	---	2.493	0.0105	tripartite motif-containing 54
TRADD	TRADD	---	2.479	0.0265	TNFRSF1A-associated via death domain
---	LOC729705 /// LOC731763	---	2.465	0.001	hypothetical protein LOC729705 /// hypothetical protein LOC731763
FEZF2	ZNF312	---	2.454	0.0309	zinc finger protein 312
LOC729887	---	---	2.452	0.0024	Similar to Serine/threonine-protein kinase PLK1 (Polo-like kinase 1) (PLK-1) (Serine-threonine protein kinase 13) (STPK13)
C9orf123	C9orf123	Hs.7517	2.432	0.0002	chromosome 9 open reading frame 123
CNR1	CNR1	---	2.422	0.0027	Cannabinoid receptor 1 (brain)
IFNAR1	---	---	2.415	0.0009	Transcribed locus
ZNF836	FLJ16287	---	2.393	0.0072	FLJ16287 protein
MYH6 /// MYH7	MYH6 /// MYH7	---	2.392	0.0188	myosin, heavy chain 6, cardiac muscle, alpha (cardiomyopathy, hypertrophic 1) /// myosin, heavy chain 7, cardiac muscle, beta
BICD1	BICD1	---	2.353	0.0003	bicaudal D homolog 1 (Drosophila)
MRGPRX3	MRGPRX3	---	2.342	0.0359	MAS-related GPR, member X3
---	EIF2AK3	---	2.325	0.0107	Eukaryotic translation initiation factor 2-alpha kinase 3
CACNA1G	CACNA1G	---	2.309	0.0171	calcium channel, voltage-dependent, alpha 1G subunit
---	ARPC5L	---	2.301	0.0007	Actin related protein 2/3 complex, subunit 5-like
NPRL3	C16orf35	---	2.295	0.0164	Chromosome 16 open reading frame 35
---	FLJ10385	---	2.289	0.006	WD repeat domain 79
LOC342918	LOC342918	---	2.284	0.0099	hypothetical LOC342918
BHLHE23	BHLHB4	---	2.281	0.0033	basic helix-loop-helix domain containing, class B, 4
SRRM2	SRRM2	---	2.276	0.0201	Serine/arginine repetitive matrix 2
---	PRDM5	---	2.27	0.0031	PR domain containing 5
FAIM3	FAIM3	---	2.269	0.027	Fas apoptotic inhibitory molecule 3 /// Fas apoptotic inhibitory molecule 3
---	IMMT	---	2.254	0.0271	Inner membrane protein, mitochondrial (mitofilin)
PCDHAC1	PCDHAC1	---	2.248	0.0112	protocadherin alpha subfamily C, 1
MAPK8IP3	MAPK8IP3	---	2.236	0.0259	Mitogen-activated protein kinase 8 interacting protein 3
LOC284861	LOC284861	---	2.225	0.0129	hypothetical gene supported by BC039313
---	LOC440064	Hs.534870	2.225	0.0002	LOC440064
FLJ37453	FLJ37453	---	2.212	0.0003	hypothetical protein LOC645580
SQSTM1	SQSTM1	---	2.209	0.0089	sequestosome 1
COX18	FLJ38991	---	2.206	0.0034	Mitochondrial COX18
---	LOC727804	---	2.193	0.0023	Hypothetical protein LOC727804
GRIA3	GRIA3	---	2.191	0.0016	glutamate receptor, ionotrophic, AMPA 3
ZNF551	ZNF551	---	2.186	0.0176	Zinc finger protein 551
LOC645676	LOC645676	---	2.164	0.0002	hypothetical LOC645676
C22orf39	LOC128977	---	2.163	0.0002	hypothetical protein LOC128977
---	GCNT2	---	2.163	0.0149	Glucosaminyl (N-acetyl) transferase 2, I-branching enzyme (I blood group)
MST1P9	MSTP9	---	2.154	0.0039	macrophage stimulating, pseudogene 9
DPP7	DPP7	Hs.37916	2.143	0	Dipeptidyl-peptidase 7
C9orf122	C9orf122	Hs.632652	2.132	0.0001	chromosome 9 open reading frame 122
LOC400027	LOC400027	---	2.129	0.0023	hypothetical gene supported by BC047417
FAM200B	LOC285550	Hs.399980	2.128	0	hypothetical protein LOC285550
FLJ10038	FLJ10038	---	2.12	0.0005	hypothetical protein FLJ10038
LOH12CR2	LOH12CR2	---	2.115	0.0061	loss of heterozygosity, 12, chromosomal region 2
LILRB3	LILRB2 /// LILRB3	---	2.114	0.0425	leukocyte immunoglobulin-like receptor, subfamily B (with TM and ITIM domains), member 2 /// leukocyte immunoglobulin-like receptor, subfamily B (with TM and ITIM domains), member 3
C6orf226	LOC441150	---	2.089	0.0006	similar to RIKEN cDNA 2310039H08
KCNK12	KCNK12	---	2.083	0.0014	potassium channel, subfamily K, member 12
---	STK35	---	2.065	0.0238	Serine/threonine kinase 35
---	C10orf95	---	2.057	0.0235	Chromosome 10 open reading frame 95
SH3GLB2	SH3GLB2	---	2.046	0.0486	SH3-domain GRB2-like endophilin B2 /// SH3-domain GRB2-like endophilin B2
KLHDC8A	FLJ10748	---	2.04	0.0488	Hypothetical protein FLJ10748
---	LOC401048	Hs.190365	2.016	0	hypothetical LOC401048
SERF2	SERF2	---	2.006	0.0004	Small EDRK-rich factor 2
PDLIM5	PDLIM5	---	-2.155	0.0276	PDZ and LIM domain 5
ABLIM2	ABLIM2	---	-2.263	0.0419	Actin binding LIM protein family, member 2
CDC25C	CDC25C	---	-2.281	0.0483	cell division cycle 25 homolog C (S. cerevisiae)
PHLDA1	PHLDA1	---	-2.29	0.0389	pleckstrin homology-like domain, family A, member 1
CDH15	CDH15	---	-2.3	0.0014	cadherin 15, M-cadherin (myotubule)
RHBDL3	RHBDL4	---	-2.393	0.0014	rhomboid, veinlet-like 4 (Drosophila)
ZNF821	LOC55565	---	-2.497	0.003	hypothetical protein LOC55565
---	PACSIN2	---	-2.508	0.0467	Protein kinase C and casein kinase substrate in neurons 2
SH3YL1	SH3YL1	---	-2.62	0.0008	SH3 domain containing, Ysc84-like 1 (S. cerevisiae)
PHLDB2	PHLDB2	---	-2.999	0.0303	pleckstrin homology-like domain, family B, member 2
LAT2	LAT2	---	-3.026	0.0116	linker for activation of T cells family, member 2
---	PAX8	---	-3.048	0.0129	Paired box gene 8
PDLIM5	PDLIM5	---	-3.061	0.0427	PDZ and LIM domain 5
CD99L2	CD99L2	---	-3.129	0.0244	CD99 antigen-like 2
C9orf156	C9orf156	---	-3.235	0.0257	chromosome 9 open reading frame 156
---	LOC730271	---	-3.29	0.0082	Hypothetical protein LOC730271
SNORA74A	SNORA74A	---	-3.358	0.0255	small nucleolar RNA, H/ACA box 74A
NPPC	NPPC	---	-3.377	0.0178	natriuretic peptide precursor C
HCG4P6	HCG4P6	---	-3.404	0.0403	HLA complex group 4 pseudogene 6
NCKIPSD	NCKIPSD	---	-3.424	0.0133	NCK interacting protein with SH3 domain
---	XPO1	---	-3.536	0.0462	Exportin 1 (CRM1 homolog, yeast)
IGHM	IGHM	---	-3.655	0.0219	immunoglobulin heavy constant mu
CNIH3	CNIH3	Hs.28659	-3.809	0	cornichon homolog 3 (Drosophila)
---	RGNEF	---	-3.823	0.0334	Rho-guanine nucleotide exchange factor
LOC100132080	PDGFA	---	-3.908	0.0282	Platelet-derived growth factor alpha polypeptide
C10orf85	C10orf85	---	-3.944	0.022	chromosome 10 open reading frame 85
MAOB	MAOB	Hs.46732	-3.945	0.0001	monoamine oxidase B
PAQR8	PAQR8	Hs.239388	-4.149	0.0001	progestin and adipoQ receptor family member VIII
COL13A1	COL13A1	---	-4.166	0.0345	collagen, type XIII, alpha 1
C10orf79	C10orf79	---	-4.205	0.0174	chromosome 10 open reading frame 79
---	IDH3A	---	-4.365	0.0106	Isocitrate dehydrogenase 3 (NAD+) alpha
NSMCE4A	C10orf86	---	-4.544	0.0306	Chromosome 10 open reading frame 86
OFCC1	OFCC1	---	-4.576	0.0388	orofacial cleft 1 candidate 1
AGR3	BCMP11	---	-4.642	0.0389	breast cancer membrane protein 11
PTH2R	PTHR2	Hs.159499	-4.703	0.0001	parathyroid hormone receptor 2
---	C21orf66	---	-4.887	0.0122	Chromosome 21 open reading frame 66
IFNA2	IFNA2	---	-5.113	0.0021	interferon, alpha 2
ZNF76	ZNF76	---	-5.187	0.0004	zinc finger protein 76 (expressed in testis)
---	USP33	---	-5.378	0.0122	ubiquitin specific peptidase 33
RIN2	RIN2	---	-5.488	0.0058	Ras and Rab interactor 2
TRAK1	TRAK1	---	-5.659	0.0058	trafficking protein, kinesin binding 1
---	CAPZA1	---	-5.681	0.0067	Capping protein (actin filament) muscle Z-line, alpha 1
LOC202181	LOC202181	---	-5.765	0.0112	Hypothetical protein LOC202181
KIAA0226	KIAA0226	---	-5.878	0.0068	KIAA0226
NCOR1	NCOR1	---	-5.947	0.0208	nuclear receptor co-repressor 1
---	HEG1	---	-5.992	0.0072	HEG homolog 1 (zebrafish)
FAM125B	FAM125B	---	-6.296	0.0021	family with sequence similarity 125, member B
FBXL21	FBXL21	---	-6.311	0.0087	F-box and leucine-rich repeat protein 21
LOC100289811 /// LOC441259 /// PMS2 /// PMS2L1 /// PMS2L14 /// PMS2L2 /// PMS2L5	PMS2L1	---	-6.694	0.0003	postmeiotic segregation increased 2-like 1
FGF7	FGF7	---	-6.918	0.018	fibroblast growth factor 7 (keratinocyte growth factor)
RGS11	RGS11	---	-7.272	0.0084	regulator of G-protein signalling 11
