# Supplementary material
Source: HighWire-hosted journal article supplement (doi:10.1101/rna.051573.115)
Supplement: Table_S2.xlsx [file Table_S2.xlsx]

## Sheet: Sheet1
Table S2
PAQR8 F	AACGTCTGGACCCATTTACTG
PAQR8 R	CAGGTGAGGTAAGTGATTGAC
ATOH7 F	AAAGCTGTCCAAGTACGAGAC
ATOH7 R	CGAAGTGCTCACAGTGGAG
MAOB F	ACTCTGGACTGAATGTGGTTG
MAOB R	GATACGATTCTGGGTTGGTCC
RAB26 F	CGATTCAAGGATGGTGCTTTC
RAB26 R	ATGGGGTAACACTGCCGGAAC
DRNT1/HS370762 F	CACCTAGACTCATCACTTAGATCCACC
DRNT1/HS370762 R	GAGACCTGATGGCTACAACTGACA
DRNT2/BC011766 F	TGGAGAAGCGATGGATGACAGAGA
DRNT2/BC011766 R	GGTGAACGGACACAATTGCCAGAA
DRNT1 upstream F	ACAGTCCAGTAATGTCACC
DRNT1 upstream R	CCCATTTGTGACATTCTAATG
DRNT2 upstream F	TCTCTTGGGGACCGG
DRNT2 upstream R	GTGCTCACTCTGTCGG
XRN1 F	AATTTGACAACTTGTACCTGG
XRN1 R	AGCCATAAAGAACACTTTCC
DcpS F	ATCCTGGAGAAGACGCC
DcpS R	CATCTCCCGTCTCTCGG
RRP41 F	TACATTGAGCAGGGCAACAC
RRP41 R	ATGGCTGCTTCGAAAGTCTG
GAPDH F	AGGTGAAGGTCGGAGTCAACGG
GAPDH R	CGTTCTCAGCCTTGACGGTGC
CLEC11A F	GAGGCCCTGATGCTGAAG
CLEC11A R	GGTTGGCGTTGCTTCCTC
MIB2 F	TGCAGTTCAACCACGAGAC
MIB2 R	TTCACTGTGTCAAGGTCGC
PIP4K2B F	TCGGGAGAGGTTTGGAATTG
PIP4K2B R	TGGCTGTCACTGTTGATGG
RNF165 F	CTGTCTATGCTGGAAGATGGAG
RNF165 R	TCCCAGTTGTGTCTCAATGTC
CSTF3 F	TCGTACAGAGGATCAGACCC
CSTF3 R	ATATCTCCCTTTTCTGCGAGC
DP1 F	CACCCACATCAGTCATCCAC
DP1 R	AGCACTTCTATGTCATCGTGG
Actin F	GAGAAAATCTGGCACCACACC
Actin R	CTGGATAGCAACGTACATGGC
BC011766 5’race primer	GGTGAACGGACACAATTGCCAGAA
BC011766 5’race nested primer	TCTCTGTCATCCATCGCTTCTCCA
HS370762 PF	CACCTAGACTCATCACTTAGATCCA
HS370762 PR1	AGGTTGGAAGACATTCAGCA
HS370762 PR2	CATTAGAATGTCACAAATGGG
HS370762 PR3	AATGCACAGTCCAGTAATGTCACC
HS370762 PR4	AATCGCTTGAACCCAGG
